# Supplementary material
Source: PubMed Central journal article supplement (PMC3868883)

JPET #209379

Title

Serum and glucocorticoid-regulated kinase 2 determines drug-activated PXR to induce gluconeogenesis in human liver cells

Author's name

Saki Gotoh and Masahiko Negishi

Journal's name

Journal of Pharmacology and Experimental Therapeutics

**Supplemental Figure 1. Statins induce the human *SGK2* and *G6Pase* genes**

ShP51 cells were treated with simvastatin (SIM, 10  $\mu$ M), atorvastatin (ATO, 10  $\mu$ M), fluvastatin (FLU, 10  $\mu$ M), pravastatin (PRA, 10  $\mu$ M) or DMSO (control) for 24 h (n=4). The relative expression of *SGK2*, *G6Pase* and *CYP3A4* mRNAs were measured by qRT-PCR. These expression levels were normalized to endogenous GAPDH using the comparative Ct method. Values are scored as a fold-change relative to livers in DMSO treated cells.

**Supplemental Figure 2. High dose of rifampicin decreases the *SGK2* gene in mouse liver**

Rifampicin (100 mg/kg, 9 h) or vehicle was administered to mice. RNA was prepared from mouse livers. The relative expression of *SGK2*, *G6Pase* and *CYP3A11* mRNAs were measured by qRT-PCR (n=3). These expression levels were normalized to endogenous GAPDH using the comparative Ct method. Values are scored as a fold-change relative to livers in DMSO treated mice. Statistical analysis was assessed by Student's t test. \*P < 0.05; and \*\*P < 0.001.

Supplemental Fig. 1.

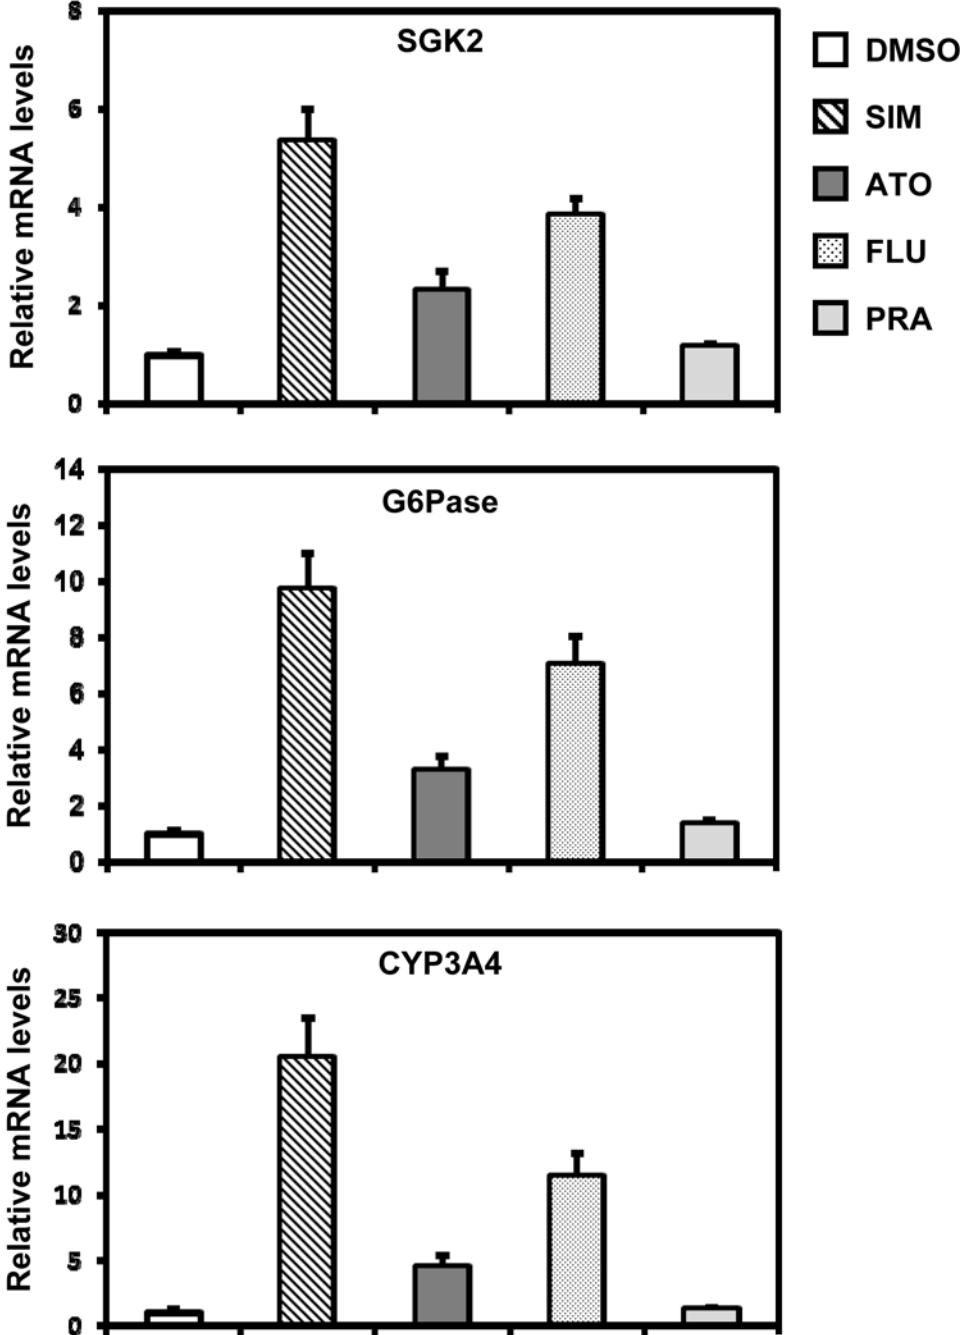

Supplemental Fig. 2.

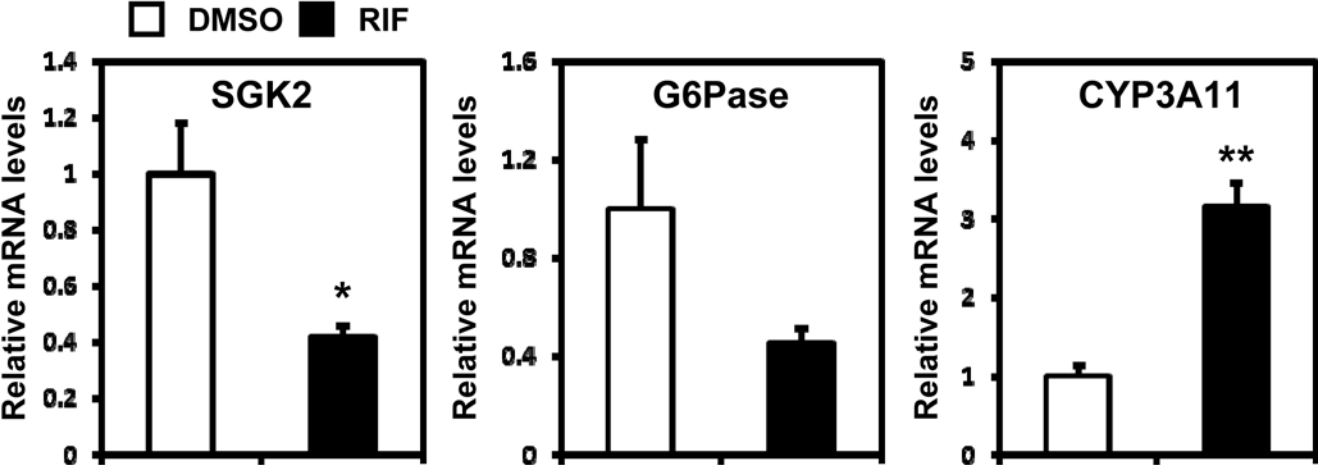

Supplement: supp_113.209379_jpet_209379_suppl_figs_and_legends.pdf [file supp_113.209379_jpet_209379_suppl_figs_and_legends.pdf]
